# Supplementary material for: Anti-Cariogenic Effects of S. cerevisiae and S. boulardii in S. mutans–C. albicans Cross-Kingdom In Vitro Models
Source: MDPI journal article supplement (doi:10.3390/pharmaceutics16020215), 2024-02-01
Supplement: s1 [file s1]

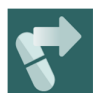

**Supplementary Materials:** The Table S1: Primers used in PCR; Figure S1: PCR amplification products obtained with 4 types of primers.

**Table S1:** Primers used in PCR.

| Genes | Primers   | Sequence                  | Amplicon size (bp) |
|-------|-----------|---------------------------|--------------------|
| gyrA  | Sm_gyrA_F | CCAAGAATCTGCTGTCCG        | 111                |
|       | Sm_gyrA_R | TTGCGACTATCTGCTATGTG      |                    |
| atpD  | Sm_atpD_F | TGTTGATGGTCTGGGTGAAA      | 176                |
|       | Sm_atpD_R | TTTGACGGTCTCCGATAACC      |                    |
| eno   | Sm_eno_F  | CAGCGTCTTCAGTTCCATCA      | 194                |
|       | Sm_eno_R  | TCACTCAGATGCTCCAATCG      |                    |
| lacG  | Sm_lacG_F | ATTGGATGCGTGCTTTTGATGG    | 94                 |
|       | Sm_lacG_R | CGACCGACACCCTTAATCTGG     |                    |
| lacC  | Sm_lacC_F | GCTGGAATTACATCGGCTCTTGC   | 157                |
|       | Sm_lacC_R | CCTCCGCTACCTCAATTTGTTGG   |                    |
| ACT1  | Ca_ACT1_F | TGCTCCAGAAGAACACCCA       | 182                |
|       | Ca_ACT1_R | CACCTGAATCCAAAACAATACCAGT |                    |
| HWP1  | Ca_HWP1_F | TGGTGCTATTACTATTCCGG      | 182                |
|       | Ca_HWP1_R | CAATAATAGCAGCACCGAAG      |                    |
| ECE1  | Ca_ECE1_F | GCTGGTATCATTGCTGATAT      | 168                |
|       | Ca_ECE1_R | TTCGATGGATTGTTGAACAC      |                    |
| CHT2  | Ca_CHT2_F | TTGGGATGCTTCTGGGGCTT      | 111                |
|       | Ca_CHT2_R | GCAGAAGAAGATGGGGCAACAC    |                    |
| ERG4  | Ca_ERG4_F | TCAAATGTGCCAATGGTTCT      | 101                |
|       | Ca_ERG4_R | AGCCCAAGTCAATGTTTGAA      |                    |

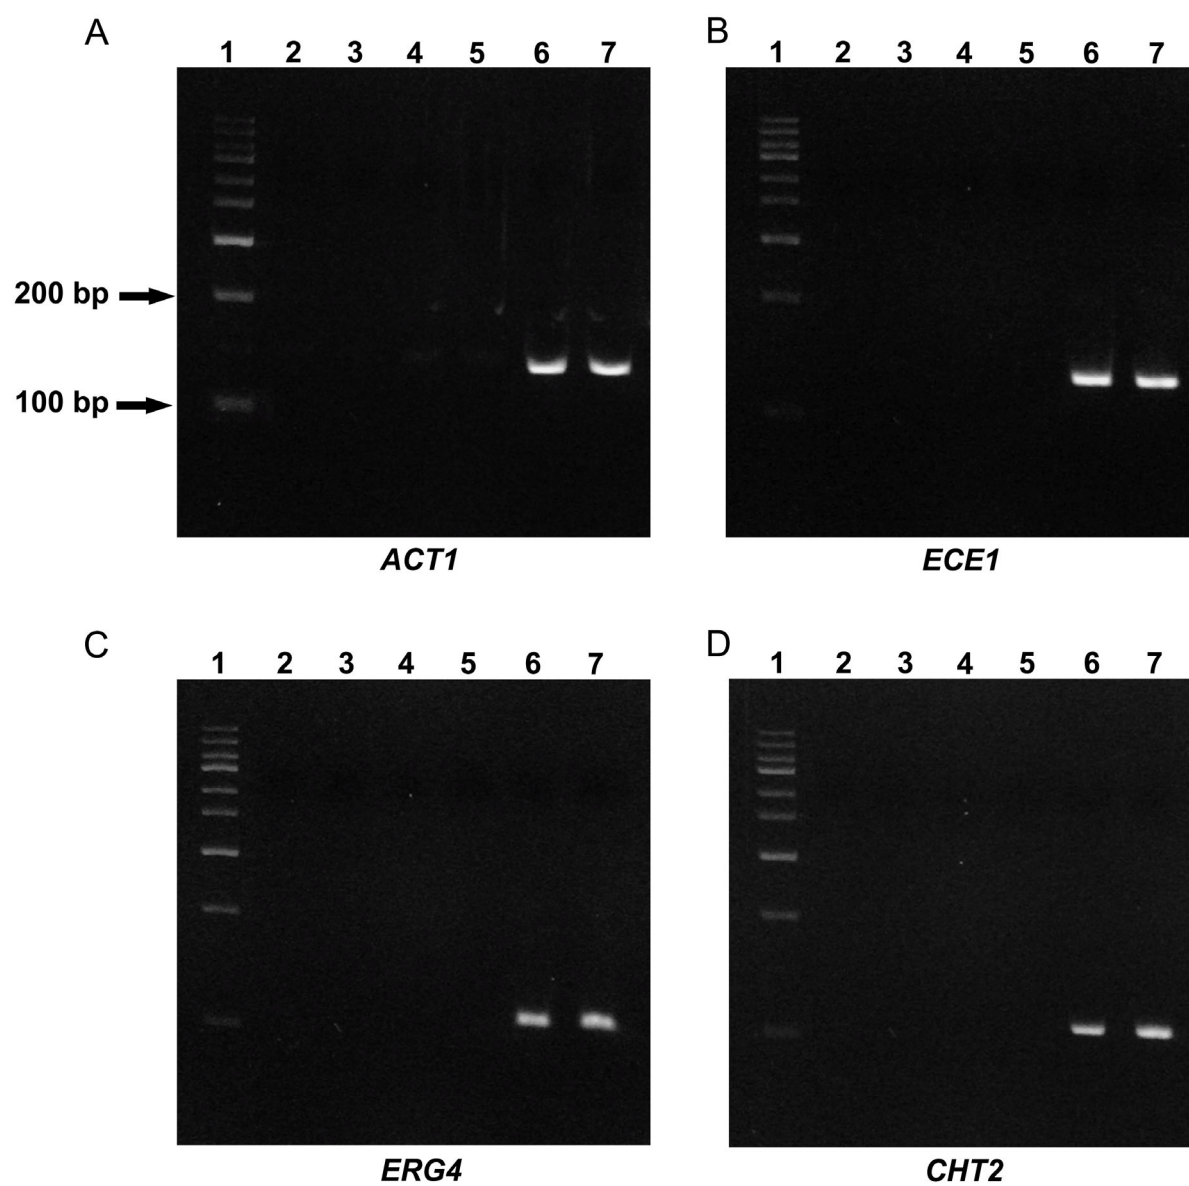

**Figure S1:** PCR amplification products obtained with 4 types of primers: *ACT1* (A), *ECE1* (B), *ERG4* (C), and *CHT2* (D). Lane 1 contains a 1 kb Plus DNA Ladder. Lane 2&3: *S. cerevisiae*; lane 4&5: *S. boulardii*. Lane 6&7 shows amplification products from *C. albicans*.
